# Supplementary material for: The influence of chemotherapy on adenosine-producing B cells in patients with head and neck squamous cell carcinoma
Source: PubMed Central journal article supplement (PMC5814178; doi:10.18632/oncotarget.23533), 2017-12-20
Supplement: oncotarget-09-5834-s001.pdf [file oncotarget-09-5834-s001.pdf]

## The influence of chemotherapy on adenosine-producing B cells in patients with head and neck squamous cell carcinoma

### SUPPLEMENTARY MATERIALS

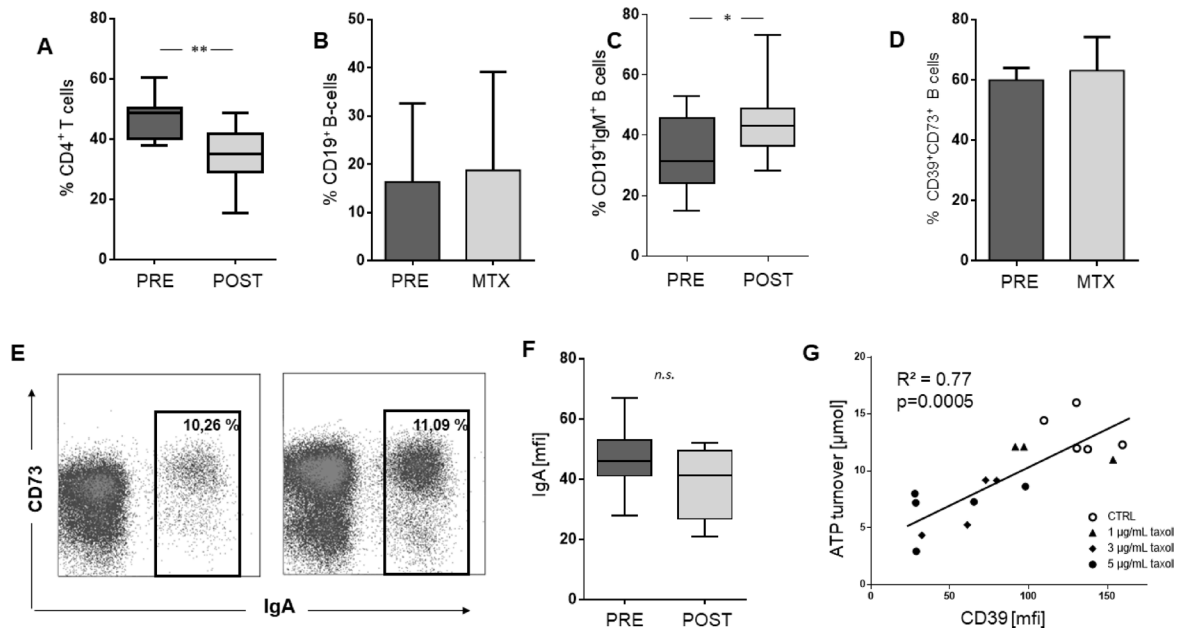

**Supplementary Figure 1:** (A and B) Frequencies of CD4<sup>+</sup> T cells and CD19<sup>+</sup> B cells were determined by flow cytometry before and after a platinum or MTX-based therapy, respectively. (C) The percentage of IgM-expressing B cells increased after CRT. (D) Adenosine-producing B cells showed no alteration in frequency after MTX-based treatment, gated on CD19<sup>+</sup> B cells. (E and F) CD19<sup>+</sup>IgA<sup>+</sup> cells were not affected by systemic antineoplastic treatment. (G) CD39 expression on B cells, and therefore ATP hydrolysis, was impaired by paclitaxel dose-dependently.

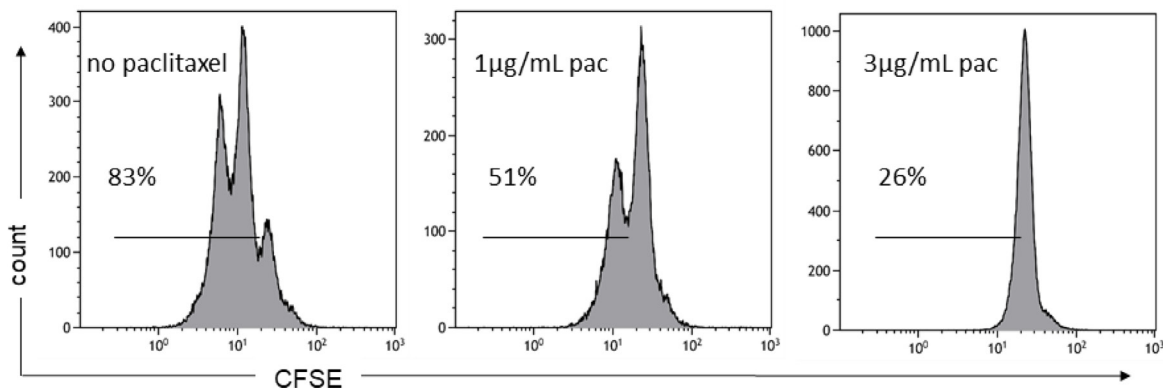

**Supplementary Figure 2:** Representative example of human B cells (precultured with IL-4, CD40L and hemagglutinin) from one healthy donor incubated with no cytostatic, 1 μg/mL and 3 μg/mL paclitaxel showing dose-dependent impairment of B cell proliferation measured by flow cytometry through dilution of CFSE.
